# Supplementary material for: CHD3 helicase domain mutations cause a neurodevelopmental syndrome with macrocephaly and impaired speech and language
Source: Springer Nature journal article supplement (doi:10.1038/s41467-018-06014-6), 2018-10-30
Supplement: MOESM3 [file 41467_2018_6014_MOESM3_ESM.pdf › 41467_2018_6014_MOESM3_ESM.pdf]

## **Description of Additional Supplementary Files**

File Name: Supplementary Data 1

Description: Clinical features and mutation details of individuals with de novo CHD3 mutations.

File Name: Supplementary Data 2

Description: Primary data of ATPase experiments.
