# Supplementary material for: CHD3 helicase domain mutations cause a neurodevelopmental syndrome with macrocephaly and impaired speech and language
Source: Nat Commun. 2018 Nov 5;9:4619. doi: 10.1038/s41467-018-06014-6 (PMC6218476; doi:10.1038/s41467-018-06014-6)
Supplement: Supplementary file 4 — Supplementary Data 1 [file 41467_2018_6014_MOESM4_ESM.xlsx]

## Sheet: Sheet1
Individual	1	2	3	4	5	6	7	8	9	10	11	12	13	14	15	16	17	18	19	20	21	22	23	24	25	26	27	28	29	30	31	32	33	34	35
Mutation details
Mutation in transcript variant 1 (NM_001005273)	c.1369G>T	c.2657A>G	c.2745G>T	c.2761G>A	c.2882G>A	c.2953C>T	c.2953C>T	c.2953C>T	c.2953C>T	c.2953C>T	c.2953C>T	c.2954G>A	c.2954G>A	c.3325_3327del	c.3357_3358delinsTC	c.3362G>C	c.3407C>T	c.3472T>C	c.3477C>A	c.3482A>G	c.3482A>G	c.3505C>T	c.3505C>T	c.3505C>T	c.3512A>G	c.3515G>A	c.3515G>A	c.3515G>A	c.3560G>C	c.3560G>C	c.3707T>C	c.4025G>A	c.4073-2A>G	c.5642G>T	c.5802_5803insGAAC
Mutation (protein) effect in isoform/transcript variant 1 (=NM_001005273)	p.Glu457*	p.His886Arg	p.Leu915Phe	p.Glu921Lys	p.Gly961Glu	p.Arg985Trp	p.Arg985Trp	p.Arg985Trp	p.Arg985Trp	p.Arg985Trp	p.Arg985Trp	p.Arg985Gln	p.Arg985Gln	p.(Gly1109del)	p.Asp1120His	p.Arg1121Pro	p.Thr1136Ile	p.Trp1158Arg	p.Asn1159Lys	p.His1161Arg	p.His1161Arg	p.Arg1169Trp	p.Arg1169Trp	p.Arg1169Trp	p.His1171Arg	p.Arg1172Gln	p.Arg1172Gln	p.Arg1172Gln	p.Arg1187Pro	p.Arg1187Pro	p.Leu1236Pro	p.Arg1342Gln	p.?(spl). Mutation affects acceptor splice site of intron 26. Skip of exon 27 is very likely.	p.Arg1881Leu	p.Phe1935Glufs*108
PolyPhen-2	NA	0.997	0,.99	0.997	1.000	1.000	1.000	1.000	1.000	1.000	1.000	0.998	0.998	NA	1.000	0.999	0.999	0.999	0.415	0.982	0.982	1.000	1.000	1.000	0.991	0.998	0.998	0.998	0.998	0.998	0.998	0.998	NA	0.996	NA
SIFT	NA	0	0	0	0	0	0	0	0	0	0	0	0	NA	0	0	0	0	0	0	0	0	0	0	0	0	0	0	0	0	0	0	NA	0	NA
CADD v.1.3 (PHRED)	38	24.5	24.2	29.3	25	34	34	34	34	34	34	33	33	NA	33	34	32	27.5	29	25.3	25.3	34	34	34	26.3	35	35	35	29.3	29.3	28.3	34	22.6	32	35
General info
Gender	M	M	F	M	F	F	F	M	F	M	M	F	M	M	M	F	M	F	F	F	F	M	M	M	F	M	M	F	M	M	M	M	F	M	M
Age at last follow up	3y7m	3y	4y	2y3m	15y	11y	17y	21y	6y7m	5y	8y3m	18y	59y	8y6m	14y4m	10y	12m	21y		9y6m	9y6m	17y	2y8m	4y5m	10y	4y7m	3y6m	7y11m	12y	6y	11y3m	4y6m	25y	1y3m	17y
Other family members affected?	no	no	no	no	no	no	Sister of individual 8 (mother mosaic for mutation)	Brother of individual 7 (mother mosaic for mutation)	no	no	no	no	no	no	no	no	no	no	no	Twin sister of individual 21	Twin sister of individual 20	no	no	no	no	no	no	no	no	no	no	no	no	no	no
Development
Global developmental delay	yes	yes	yes	yes	yes	yes	yes	yes	yes	yes	yes	yes	yes	yes	yes	yes	yes	yes	yes	yes	yes	yes	yes	yes	yes	yes	yes	yes	yes	yes	yes	yes	yes	yes	yes
Walked unsupported	1y10m	2y7m	2y6m	not reached yet	not reached	not known	3y	2y	1y10m	3y6m	1y6m	2y	2y	1y2m	1y6m	5y	not reached yet	3y6m	4y	4y	4y	2y6m	2y	2y6m	4y	4y	1y8m	3y	2y5m	1y11m	1y7m	2y11m	5y-6y	not reached yet	1y6m
Fine motor delay	yes	yes	yes	yes	yes	yes	yes	yes	yes	not known	not known	yes	not known	yes	yes	yes	yes	yes	yes	yes	yes	yes	yes	yes	yes	yes	yes	yes	yes	yes	yes	not known	yes	yes	not known
First words	24m	NA	1y6m	1y6m	NA	2y	4y	3-4y	1y2m	not known	4y	2y	not known	2y8m	not known	4y	not reached yet	1y3m-1y11m	7y	4y	5y	4y	not reached yet	not known	4y	not reached yet	13m	21m	13m	15m	18m	not known	not known	not reached yet	on time
Current speech	three word sentences	babbles only, uses some signs	complete sentences	3-4 words	no speech	complete sentences	impaired intelligibility, high pitched voice	not known	sentences	10 words	not known	sentences	sentences	short sentences.	not known	20 single words	none	repetitive and echolalic speech	only a few words	short sentences, hoarse voice	short sentences, hoarse voice	sentences	no words currently, vowel sounds/babbling	sentences, often not accurately constructed	sentences	single word vocalizations, signs and a communication device	short sentences	short sentences	sentences	short sentences	sentences	short sentences	only few words, mainly uses gestures and sounds.	no speech yet	sentences
Did patient receive speech/language therapy?	yes	yes	yes	yes	no	yes	not known	not known	yes	not known	not known	yes	not known	yes	not known	yes	not yet	yes	yes	yes	yes	yes	yes	yes	yes	yes	yes	yes	yes	yes	yes	not known	no	yes	yes
Description of speech/language impairment	initially dfficulties with repeating words, good understanding; can now very well communicate his wishes	Babbles only, some signs; receptive language is strong: knows letters, numbers, shapes, colors. Has some sign language.	speech/language delay	Expressive speech delay. Receptive speech appears normal.	No speech.	Language production and reception impaired.	not known	not known	No formal diagnosis besides globally delayed, sentences are mostly intelligible.	not known	normal language development	Issues with speech enunciation, hypernasal voice, occasional stuttering. Impaired language on all subcompoinents of CELF4.	severe delay, yet verbal skills scored as relative strength	Receptive language better than speech production.	Speech delay.	Speech and language delay, particularly expressive	Has not started speaking yet, uses melodic vocalization	not known	severe language disorder (expressive and receptive).	not known	not known	severe verbal apraxia; moderate oral apraxia; moderate receptive and expressive language disorder; mild stuttering disorder. Impaired intelligibility.	Expressive language more impaired than expressive language, can follow simple instructions	delayed speech/language development, formal diagnosis not known	speech difficulties	predominantly vocalizations and some word approximations. Uses communication device.	No specific speech or language problems	Dysfluent, stammering, impaired intelligibility.	at 29 mnts 4 word sentences, 'smart talking'. Speech production more impaired than receptive language. Impaired intelligibility. High pitched voice.	not known	Dysarthria, nasal speech	not known	Speech production more impaired than receptive language.	Delayed speech development, oromotor problems.	Receptive and expressive delay, impaired intelligibility.
Degree of ID? (IQ)	DD	DD (probably normal intelligence with speech delay)	Borderline ID (verbal IQ 87, performance IQ 78)	DD	severe ID	Mild ID (IQ 58)	ID (level unknown)	Mild ID (IQ 62)	DD	moderate ID	moderate ID	Moderate ID	Mild ID	Severe ID	Mild ID	severe ID	Moderate ID	Moderate ID (IQ 43)	Severe ID	Severe ID	Severe ID	Borderline ID (total IQ 72)	DD	DD	mild ID	Moderate ID	Mild-Moderate ID	Moderate ID	Mild ID (IQ 73)	Moderate ID	Mild ID (IQ 64)	Borderline ID (IQ 76)	Severe ID	DD	Mild ID (IQ 61)
Autism/autistic features	autistic features	no	no	no	no	PDD-NOS	mild autistic features	mild autistic features	no	not known	no	autistic features	no	no	not known	no	no	no	no	no	no	no	no	autistic features	no	not known	no	no	PDD-NOS	no	PDD-NOS	not known	autistic features	no	no
ADHD/ADD	no	no	attention deficit without hyperactivity	not known	no	no	not known	not known	no	not known	no	no	no	no	not known	no	no	no	not known	no	no	ADD	no	not known	short attention span	not known	short attention span	no	no	no	ADHD	not known	no	no	no
Behavioral abnormalities	open towards others, sometimes difficult behaviour with temper tantrums in stress, hand-flapping	Happy, social, engaged with others. Affectionate, friendly, described as endearing. Good disposition. Sensory issues to loud noise, bright lights, swings.	No other behavioral problems	bruxism	always pleasant in behaviour	Flapping, hyperactive and claiming behaviour. Stereotypic movements.	not known	not known	No major behavior problems, sometimes struggles with emotions and gets upset/frustrated	not known	no particular behavioral problems.	Frequently puts objects in her mouth. Easily distractable and constantly needs to keep her hands busy and mind busy. Some hand-flapping and hopping on both feet, when excited.	not known	always pleasant in behaviour	not known	No, sociable	Very attentive, pleasant social behaviour. Since age 8m recurrent oculogyral crisis and episodes of sudden movement (thrusting upward of the thorax). Also recurrent "shuddering" when emotional.	Some OCD-like behavior; some nervous mannerisms; routine oriented	timid	pleasant in behaviour	pleasant in behaviour	very sociable; hyperactive	very happy, social personality	active, difficulty to gain attention	very sociable, friendly	repetitive behaviors, hand flapping, head banging	friendly, good social behaviour	sociable	no behavioral issues	restless, friendly	tics, temper tantrums. Echolalia. Hand flapping. Very happy and social personality. Very restless, especially in stress.	not known	Stereotypic movements, sometimes agression, problems with changes, automutilation.	not known	Friendly, happy
Growth parameters
Weight <-2.5 SD or >+2.5 SD	no	no	no	no	<-2.5 SD	no	no	no	no	no	not known	no	no	no	no	no	no	no	no	no	no	no	no	no	no	no	no	<-2.5 SD	no	no	no	not known	<-2.5 SD	no	no
Height <-2.5 SD or >+2.5 SD	no	no	no	no	<-2.5 SD	no	no	no	no	no	no	no	no	no	no	no	no	no	no	no	no	no	no	no	no	no	>+2.5 SD	no	no	no	no	not known	no	no	no
Macrocephaly (≥ +2.5SD/P97) /microcephaly? (≤ -2.5SD/P3)	macrocephaly	macrocephaly	no	no	microcephaly	no	macrocephaly	macrocephaly	macrocephaly	macrocephaly	no	macrocephaly	macrocephaly	no	not known	macrocephaly	no	macrocephaly	macrocephaly	no	no	macrocephaly	macrocephaly	no	macrocephaly	macrocephaly	macrocephaly	no	macrocephaly	macrocephaly	macrocephaly	not known	no	no	no
Neurology
Brain MRI	no abnormalities	thin corpus callosum	no abnormalities	subgaleal hematoma, no other abnormalities	no abnormalities (except for microcephaly)	Widening of CSF spaces	not performed	no abnormalities	cortical abnormalities suggestive for cortical dysgenesis, mildly widened CSF spaces	results not known	no abnormalities	mildly widened CSF spaces	encephalomalacia left temporal and parietal lobes	thin corpus callosum	no abnormalities	no abnormalities	widening of CSF spaces, bilateral cerebral atrophy, bifrontal hygromas	not performed	no abnormalities	Widening of CSF spaces	Widening of CSF spaces	no abnormalities	mildly widened CSF spaces	not performed	normal	mildly widened CSF spaces, mildly prominent perivascular spaces in periatrial white matter.	not performed	no abnormalities	widening of CSF spaces (CT scan)	cortical dysplasia	Some small subcortical white matter lesions in frontal lobes.Wide perivascular spaces. Malrotation of the hippocampus with flying bird sign.	focal patch or nodular HIS at bilateral periventricular white matter, especially occipital area	not performed	widening of CSF spaces	not performed
Wide CSF spaces?	no	no	no	no	no	yes	not performed	no	yes	no	no	yes	no	not reported	no	no	yes	not performed	no	yes	yes	no	yes	no	no	yes	not performed	No	yes	no	no	no	not performed	yes	not performed
Hypotonia	yes	yes	yes	yes	yes	yes	not known	not known	yes	not known	not known	yes	not known	no	not known	no	yes	no	yes	yes	yes	yes	yes	no	yes	yes	yes	yes	yes	no	yes	not known	no	yes	no
Epilepsy/seizures	no	no	no	no	no	neonatal convulsions	no	no	no	no	no	no	no	no	no	no	pathological EEG at age 8m, recent EEG unremarkable (without therapy)	no	no	no	no	no	no	no	no	no	no	no	no	spasm with hypsarythmie at 6 months, not anymore	no	no	no	yes, myoclonal epilepsy of infancy since age 1y, drug-resistant	no
Neurology; other abnormalities	poor in motion transitions. Inward rotation of the feet when walking, slightly broad based.	broad based gait with arms flexed. slight external rotation of both lower extremities.	dystonia, broad based gait	normal	spastic tetraplegia	abnormal gait	no	no	no	irregular broad based gait	no	Issues with balance, coordination	Parkinsonism since 1-2 years, resting/pill-rolling tremor, progressive weakness, swallowing difficulties, long standing equinovarus posturing of one foot	mild unsteady gait	not known	no	episodes of spontaneous movement (before truncal upthrust and oculogyral crisis, now emotional head "shuddering"	Somewhat wide-based, unsteady gait and feet slightly turned in while walking	no	delayed visual maturation	delayed visual maturation	no	no	no	no	poor balance,	no	no	developmental coordination disorder	no	Poor balance, suboptimal coordination. Walks with exorotation of legs and feet.	mildly unsteady gait only	no	no	no
Dysmorphisms
Forehead	high forehead with frontal bossing	high forehead with frontal bossing	prominent forehead with frontal bossing	no abnormalities	sloping forehead	broad forehead, frontal bossing	prominent forehead	prominent forehead	broad forehead	prominent forehead	not known	prominent forehead	tall	high forehead	not known	broad	frontal bossing	no abnormalities	prominent forehead	prominent forehead	high forehead	tall and boxy with dimpling	high forehead with frontal bossing	frontal bossing	high forehead	high forehead and minimal frontal bossing	prominent	broad	prominent	high forehead with frontal bossing	prominent, bossing, metopic ridge	prominent	no abnormalities	broad, frontal bossing	no abnormalities
Widely spaced eyes (hypertelorism or telecanthus)	yes	no	yes	yes	yes	yes	yes	no	no	yes	not known	yes	no	yes	not known	yes	yes	no	yes	yes	yes	yes	yes	not known	yes	no	yes	yes	yes	yes	yes	not known	yes	yes	no
Teeth	no abnormalities	no abnormalities	teeth malposition	missing maxillary lateral incisors	large teeth	taurodontia, delayed changing into adult dentition	not known	not known	no abnormalities	not known	conical left upper incisor	Crowded teeth - extensive dental history, instance of no permanent teeth under a decidious tooth	not known	no abnormalities	underbite	no abnormalities	no abnormalities	no abnormalities	no abnormalities	no abnormalities reported	no abnormalities	no abnormalities	enamel hypoplasia	no abnormalities	no abnormalities	upper central diastema	no abnormalities	no abnormalities	no abnormalities	small teeth	Missing incisors, large front teeth.	not known	wide-spaced teeth, crowded teeth	no abnormalities	no abnormalities
Palate	high arched palate	high arched palate	high arched palate	no abnormalities	no abnormalities	no abnormalities	high arched and narrow palate	high arched and narrow palate	no abnormalities	not known	not known	high arched palate with bifid uvula	no abnormalities	no abnormalities	not known	submucous cleft palate	no abnormalities	no abnormalities	high palate	no abnormalities	no abnormalities	narrow palate; small oral cavity	no abnormalities	no abnormalities	high palate	no abnormalities	arched palate	no abnormalities	no abnormalities	no abnormalities	no abnormalities	no abnormalities	not known	no abnormalities	no abnormalities
Other
Neonatal issues (excluding hypotonia)	no	one episode of hypoglycemia	no	cephalohematoma	feeding problems, PEG tube	feeding problems	no	no	no	no	no	caesarian section for fetal decelerations and oligohydramnios	not known	no	not known	Stridor, jaundice, feeding problems	respiratory distress after RSV infection, ICU for 2d	no	respiratory distress, feeding problems	no	no	no	respiratory distress, had to be resuscitated, in NICU for 2d	feeding problems	respiratory distress and feeding problems	no	no	emergency caesarian section for fetal distress. Pneumothorax, NICU for 1 week, feeding problems that required tube feeding	short stay in NICU because of moaning. Feeding problems.	no	no	not known	feeding problems	feeding problems	no
Vision	no abnormalities	hypermetropia	convergent strabism, astigmatism, hypermetropia	congenital entropion	no abnormalities	cerebral visual impairment, nystagmus, strabism, hypermetropia	hypermetropia	hypermetropia	no abnormalities	not known	hypermetropia	myopia, astigmatism, strabism	no abnormalities	no abnormalities	no abnormalities	hypermetropia	no abnormalities	hypermetropia, amblyopia	refractive error	hypermetropia, strabism, cerebral visual impairment	hypermetropia, strabism, cerebral visual impairment	no abnormalities reported, wears glasses	slight refractive error, exotropia	normal	exophoria	has glasses	strabism	Impaired depth perception.	hypermetropia	no abnormalities	doubt about depth perception, no other abnormalities	not known	strabism	strabism	normal
Hearing problems	no	no	hyperacusis	conductive hearing loss	no	no	no	no	no	not known	no	no	not known	no	not known	ear tubes	no	no	ear tubes	no	no	ear tubes	no	no	no	no	no	no	no	no	no	no	no	no	no
Heart; abnormalities reported	no	no	no	no	no	no	no	no	no	not reported	no	no	no	no	aortic dilatation	no	no	no	no	Atrial septal defect, Pulmonic valve stenosis	no	no	no	no	no	no	no	Perimembranous VSD, right ventricular outflow tract muscle resection	no	no	no	no	no	no	no
Kidneys; abnormalities reported	not known	no	no	no	no	no	not known	not known	no	not known	not known	no	no	no	not known	no	no	no	no	no	no	no	no	no	no	not known	no	no	no	no	no	no	no	no	no
Genital abnormalities in males	orchidopexia performed	no	NA	left testis initially undescended, now retractile. webbing between penis and scrotum.	NA	NA	NA	not known	NA	not known	not known	NA	no	no	undescended testes, orchidopexy performed	NA	no	NA	NA	NA	NA	Undescended testes	Undescended testes, hypospadias,"hidden penis"	no	NA	both testes descended, but left testes high in scrotal sac	no	NA	no	no	no	not known	NA	not reported	no
Hernias	not known	no	no	no	no	no	not known	not known	no	not known	not known	no	no	no	not known	no	no	no	no	no	no	inguinal hernia	inguinal hernia	ingunial hernia	no	hiatal hernia	umbilical hernia (neonatal period)	no	no	no	no	not known	no	no	no
Skeletal/joint abnormalities (including joint hyperlaxity / dislocations)	Hyperlaxity of all major joints	Hypotonia in legs	Joint hyperlaxity, adducted thumbs	no	severe orthopedic problems hip, feet. Luxations of thumbs, wrists, shoulders on young age, not anymore	joint hyperlaxity	not known	not known	hyperlaxity in elbows, ankles, and knees.	not known	not known	hyperlordosis of lumbar spine. Hypermobile flat feet.	equinovarus and high arched foot (only left)	no	not known	Pes planus and laxiity of large joints	no	Mild scoliosis, thoracic kyphosis, and somewhat exaggerated lumbar lordosis. Mild cubitus valgus of upper extremities.	pectus chest deformity, joint hypermobility,	no	no	no	joint hyperlaxity, wears ankle foot orthoses	no	joint hyperlaxity	no	no	no	hypermobility, no dislocations.	pectus abnormality	Pedes plani. Hyperextensible thumbs.	not known	scoliosis, kyphosis. Laxity in finger joints.	no	no
Other	loves to eat, needs to be controlled by parents, intermittend hyperphosphatesia,	Brown syndrome, laryngeal cleft, patch of tan discloration of skin on back of neck and mid-back, obstructive sleep apnea	pneumonitis, pyelonephritis	Sleep apnea. non-pitting edema in feet	unilateral choane atresia + hypoplastic epilglottis. Siallorhea requiring botox and radiotherapy.	drooling until 8y, high pain treshold, sleeping problems. V-shaped sacral crease	no	no	One café au lait spot	no	no	anteriorly placed anus, chronic and recurrent upper respiratory infections; increased subcutaneous adipose tissue deposition, copious saliva production evident from birth onwards, possible impairment of thirst; low hematocrit in childhood with normal hemoglobin level and MCV	Recently volvulus with colonic ischemia. Ptosis.	no	primary hypogonadism, malar hypoplasia. Also de novo mutation in CIC gene: NM_015125.3:c.1444G>T; p.(Glu482*)	V-shaped sacral crease	multiple skin creases on left posterior thigh	Some dysfunctional uterine bleeding.	hypertrichosis	no	Sagittal craniosynostosis, constipation	3 cafe au lait spots. Thin and concave toenails. Thin fingernails. Lateral right-side hair whorl. Skin syndactyly of toes (2-3).	abnormal bladder shape on MRI	no	livedo	minor pigment variation and eczema. history of reactive airway disease/asthma. Reflux and esophagitis.	wide mamillary distance, increased sweating	V shaped sacral crease	Extensive drooling.	no	extra right nipple. High pain treshold.	no	Constipation. Severe feeding problems requiring tube feeding until age 7y. Recurrent anemia. Eczema	feeding problems, does not like solid food	no
